# Supplementary material for: Extrahepatic transplantation of 3D cultured stem cell-derived islet organoids on microporous scaffolds
Source: Royal Society of Chemistry journal article supplement (doi:10.1039/d3bm00217a), 2023-01-01
Supplement: d3bm00217a1.pdf [file d3bm00217a1.pdf]

## Supplementary Information

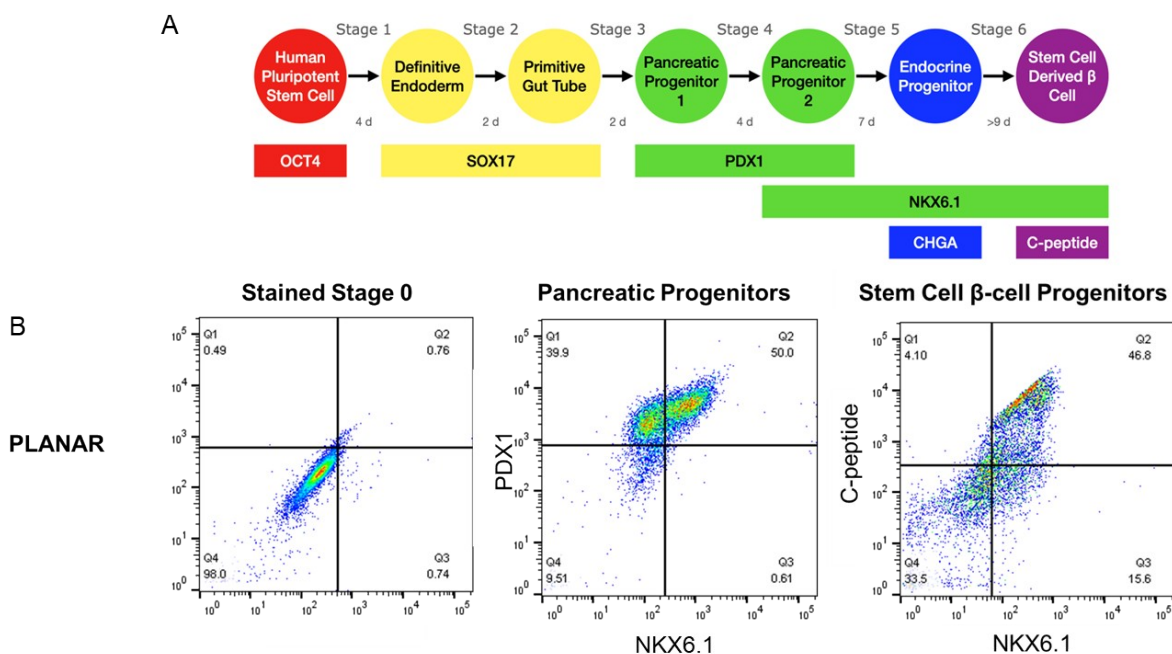

**Supplementary Figure 1.** (A) Schematic of the stages of differentiation and corresponding markers assessed by flow cytometry. (B) Representative flow cytometry plots from different stages in planar culture. Pancreatic progenitors were evaluated at the conclusion of stage 4 and stem cell  $\beta$ -cells progenitors at maturation in stage 6.

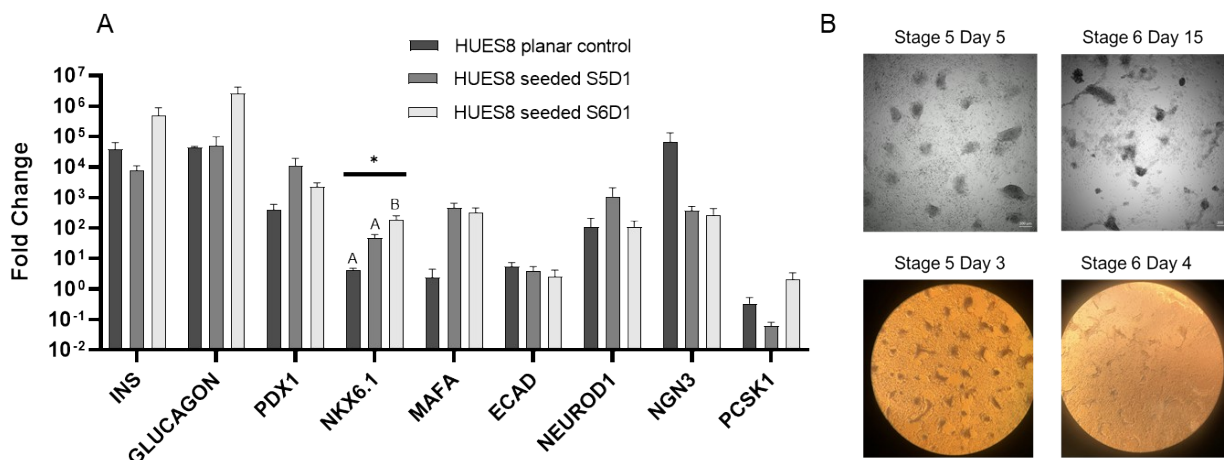

**Supplementary Figure 2.** (A) Gene expression analysis of maturation markers of cells seeded onto scaffolds at S5D1 and S6D1 compared to planar culture. The HUES8 cell line was used in planar and scaffold culture. Statistical significance was determined based on unpaired T-test for each gene pair  $*P < 0.05$ . ( $n = 3$  planar,  $n = 5$  S5D1,  $n = 4$  S6D1) (B) Brightfield images of HUES8-derived cells at the endocrine progenitor and stem cell-derived  $\beta$ -cell stages of differentiation (Scale bar indicates 200  $\mu$ m).

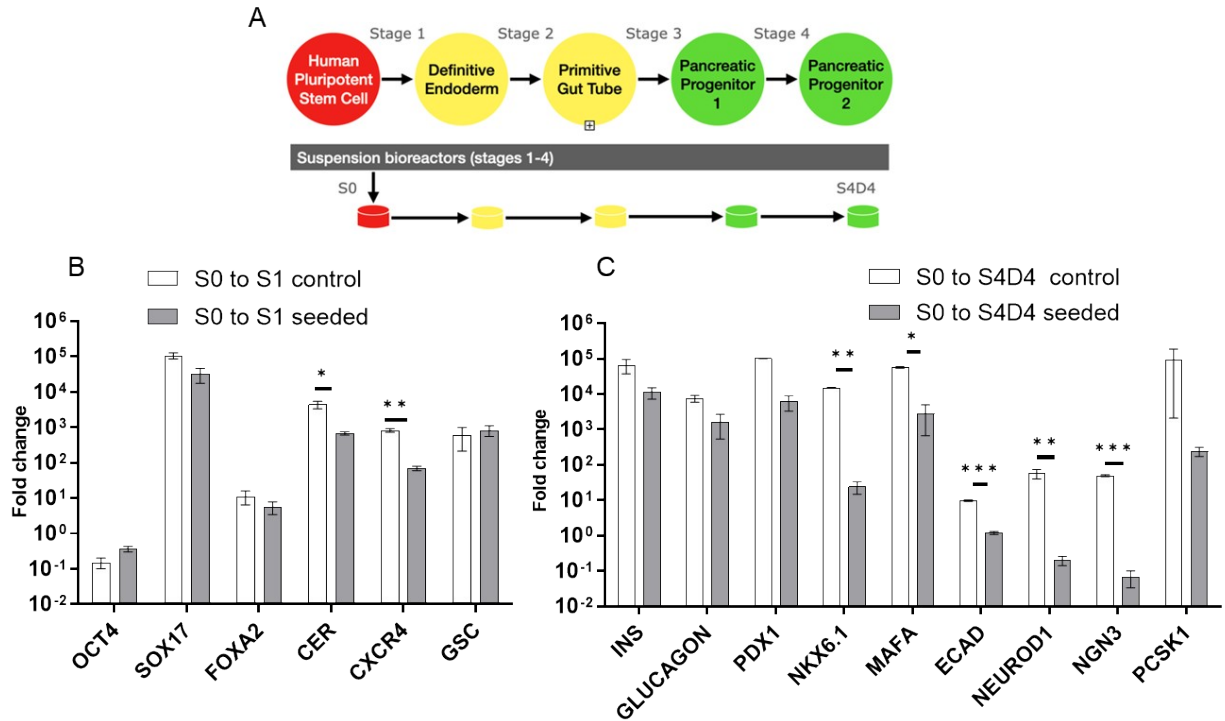

**Supplementary Figure 3.** Early Stage (S0) Cluster Seeding on Scaffolds: (A) Schematic of seeding timing and analysis. (B) Clusters were cultured in suspension, or seeded onto scaffolds prior to stage 1, and cultured to completion of stage 1 definitive endoderm. (n=2 for suspension, n=3 for scaffold culture) (C) Clusters were cultured in suspension, or seeded onto scaffolds prior to stage 1, and cultured to completion of stage 4 pancreatic progenitor. (n=2 for suspension, n=3 for scaffold culture) Statistical significance was determined based on unpaired T-test for each gene pair \*P<0.05, \*\*P<0.01, \*\*\*P<0.001.

**Supplementary Table 1.** qRT-PCR primers used during early stages of  $\beta$ -cell differentiation

| Gene  | Function                                                                                                                            |
|-------|-------------------------------------------------------------------------------------------------------------------------------------|
| OCT4  | Marker of pluripotency                                                                                                              |
| SOX17 | Sex determining region Y-box 17; expressed by definitive endoderm and pancreatic endocrine cells <sup>39</sup>                      |
| FOXA2 | Forkhead box A2; involved in early pancreatic progenitor formation <sup>39</sup>                                                    |
| CER   | Cerberus; expressed by definitive endoderm cells                                                                                    |
| CXCR4 | Chemokine [CXC motif] receptor 4; expressed by definitive endoderm cells <sup>39</sup>                                              |
| GSC   | Goosecoid homeobox protein involved in morphogenesis; expressed by definitive endoderm and pancreatic endocrine cells <sup>39</sup> |

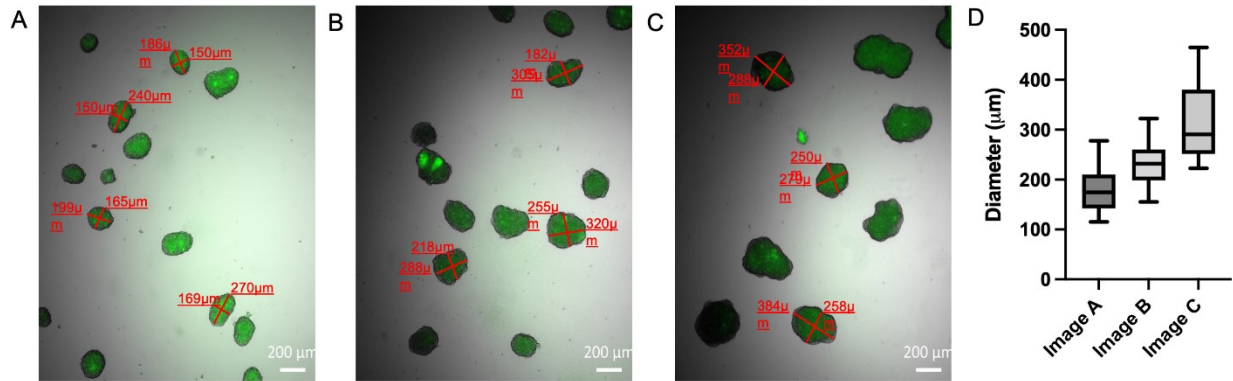

**Supplementary Figure 4.** (A, B, C) Representative images from three separate batches of reaggregated cell clusters, imaged 3-4 days after cells were initially dissociated for reaggregation. (D) Average diameter measured from each image. Measurements of 13, 11, and 9 clusters were taken from images A, B, and C, respectively. Two perpendicular measurements were taken from each cluster. The overall average length from 66 measurements was 234 $\mu$ m with a standard deviation of 74.7 $\mu$ m.
